# Supplementary material for: Inducing Energetic Switching Using Klotho Improves Vascular Smooth Muscle Cell Phenotype
Source: MDPI journal article supplement (doi:10.3390/ijms23010217), 2021-12-25
Supplement: s1 [file s1]

**(A)**

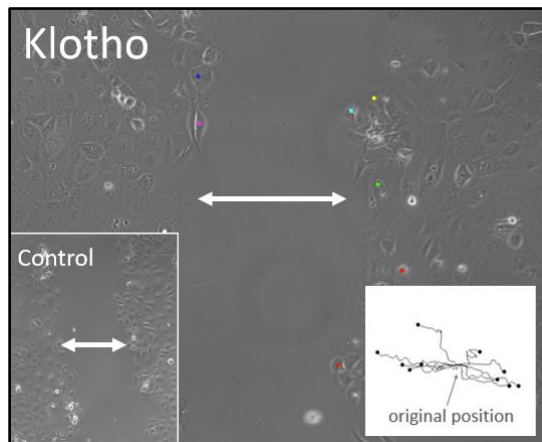

**(B)**

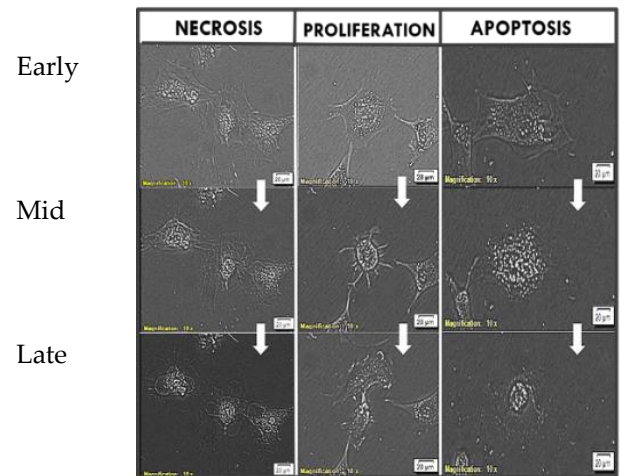

**Supplemental Figure S1.** Live cell image of phenotypic changes in VSMC in the presence and absence of Klotho (A) Live cell time-lapse imaging following scratch assay closure with improved migration of klotho treated monolayers over 24 hrs (n=3),(Image-J cell track module). (B) Representative images tracking the different live cell phenotypes over time (white arrows show progression from top to bottom images) for necrosis, mitosis and apoptosis.

**Supplemental Table S1.** List of drugs screened for changes in cell energetics.

| Compound                                                                                                 | Doses                        | Stimulation (hr) | Mechanism                                                                                                                         | References                                                                             |
|----------------------------------------------------------------------------------------------------------|------------------------------|------------------|-----------------------------------------------------------------------------------------------------------------------------------|----------------------------------------------------------------------------------------|
| AICAR (in H <sub>2</sub> O)                                                                              | 0.1; 0.25; 0.5; 1; 2 mM      | 2 h              | AMP mimetic                                                                                                                       | Goirand et al 2007, [21]<br>Sun et al 2007,[22]                                        |
| A-769662 (in DMSO)                                                                                       | 5; 10; 20; 50; 100 $\mu$ M   | 2 h              | Allosteric activation of AMPK (Acting on AMPK $\beta$ 1)                                                                          | Treibak 2009, [23]<br>Goransson, 2007[24]                                              |
| Berberine (in DMSO)                                                                                      | 10; 20; 50; 100; 200 $\mu$ M | 24 h             | Complex 1 inhibition                                                                                                              | Wang et al, 2011[18]<br>Lee et al 2006[25]                                             |
| Etoposide (in DMSO)                                                                                      | 5; 10; 20; 50; 100 $\mu$ M   | 24 h             | ATM-dependent mitochondrial biogenesis and AMPK activation                                                                        | Fu et al, 2008[26]                                                                     |
| Klotho (in H <sub>2</sub> O)<br>( <sup>1</sup> membrane <sup>2</sup> soluble <sup>3</sup> intracellular) | 1.0 to 0.0001ng/mL           | 2-24 h           | <sup>1</sup> FGF23 co-receptor<br><sup>2</sup> Inhibitor of IGF/TGF- $\beta$ 1<br><sup>3</sup> Cytokine suppressant & antioxidant | Wolf I 2008[11]<br>Imura et al 2007 [12]<br>Kurosu et al 2005[7]                       |
| Losartan (in H <sub>2</sub> O)                                                                           | 1; 2.5; 5; 20; 50 $\mu$ M    | 24 h             | p21 and p53 expression                                                                                                            | Kim et al 2010[17]                                                                     |
| Metformin (in H <sub>2</sub> O)                                                                          | 0.1; 0.5; 1.0; 5; 10 mM      | 2 h              | Complex 1 inhibition                                                                                                              | Zho et al[27]                                                                          |
| Resveratrol (in DMSO)                                                                                    | 10; 20; 50; 70; 100 $\mu$ M  | 24 h             | SIRT1-dependent mitochondrial biogenesis                                                                                          | Price et al, 2012[28]                                                                  |
| Trimetazidine (in H <sub>2</sub> O)                                                                      | 0.1;1.0;10;100 $\mu$ M       | 2-24 h           | Inhibitor of free fatty acid oxidation and increased glucose utilisation                                                          | Zheng, S. <i>et al</i> 2018[29]<br>Chrusciel et al 2014[30]<br>Marzilli et al 2019[31] |
| Troglitazone (in DMSO)                                                                                   | 5; 10; 20; 50; 100 $\mu$ M   | 24h              | Mitochondrial membrane depolarisation                                                                                             | Le Brasseur et al, 2006[32]                                                            |
| Salicylate (in H <sub>2</sub> O)                                                                         | 0.5; 1; 2; 5; 10 mM          | 24h              | Allosteric activation of AMPK                                                                                                     | Hawley et al, 2012[20]                                                                 |

**Supplemental Table S2.** Primary and secondary antibodies used in immunocytochemistry and immunohistochemistry. (All others as previously described Mercer *et al* 2005).

| Pathway                                            | Antibody                                                                                  | ICC 1 <sup>o</sup> Ab | IHC 1 <sup>o</sup> Ab | Company                      | Secondary antibody                              |
|----------------------------------------------------|-------------------------------------------------------------------------------------------|-----------------------|-----------------------|------------------------------|-------------------------------------------------|
| <b>p-ACC<br/>280kDa<br/>(Cyto and SR)</b>          | Phospho-Acetyl-CoA Carboxylase (Ser 79) Antibody #11818 (inhibitory side phosphorylation) | 1:100                 | 1:200                 | Cell Signalling Technology © | Anti-Rabbit Alexa543 1:500                      |
| <b>Total ACC<br/>280kDa</b>                        | ACC Antibody #3676 Cyto and SR) (not shown)                                               | 1:250                 | 1:400                 | Cell Signalling Technology © | Anti-Rabbit Alexa543 1:500                      |
| <b><math>\alpha</math>-SM-Actin<br/>Cytoplasm)</b> | $\alpha$ -SM-Actin Antibody (Mouse)                                                       | 1:100                 | 1:200                 | Abcam ©                      | Anti-Mouse (alexa543) 1:500                     |
| <b>AMPK<br/>62kDa<br/>(Cytoplasm)</b>              | Phospho-AMPK $\alpha$ (Thr172) Antibody (Rb) #2535                                        | 1:100                 | 1:200                 | Abcam ©                      | IgG Anti-Mouse 1:500                            |
| <b>Phospho-Pink1</b>                               | Ab117091<br>Ab237070                                                                      | 1:100                 | 1:200                 | Abcam©                       | IgG Donkey Anti-rabbit Ab150073 and Ab175780 RP |
